# Supplementary material for: Valproic Acid Significantly Improves CRISPR/Cas9-Mediated Gene Editing
Source: PubMed Central journal article supplement (PMC7349485; doi:10.3390/cells9061447), 2020-06-10
Supplement: cells-09-01447-s001.pdf [file cells-09-01447-s001.pdf]

**Figure S1**

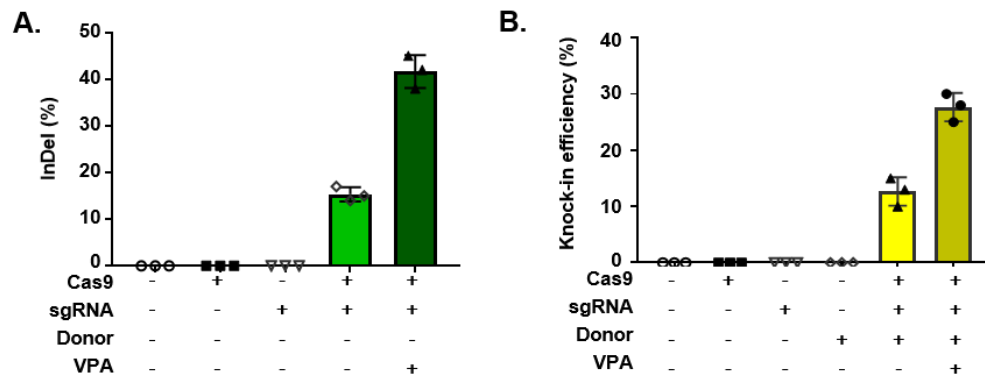

**Figure 1.** VPA enhances CRISPR/Cas9-mediated targeting efficiency. **(A)** The percentage of InDel efficiency in mouse embryonic stem cells evaluated using sequencing analysis. Data are expressed as mean  $\pm$  SD,  $n = 3$ .  $*p < 0.05$ , one-way analysis of variance (ANOVA) with Tukey's post hoc test. **(B)** The knock-in efficiency in the mouse embryonic stem cells evaluated using sequencing analysis. Data are expressed as mean  $\pm$  SD,  $n = 3$ .  $*p < 0.05$ , one-way analysis of variance (ANOVA) with Tukey's post hoc test.

**Figure S2**

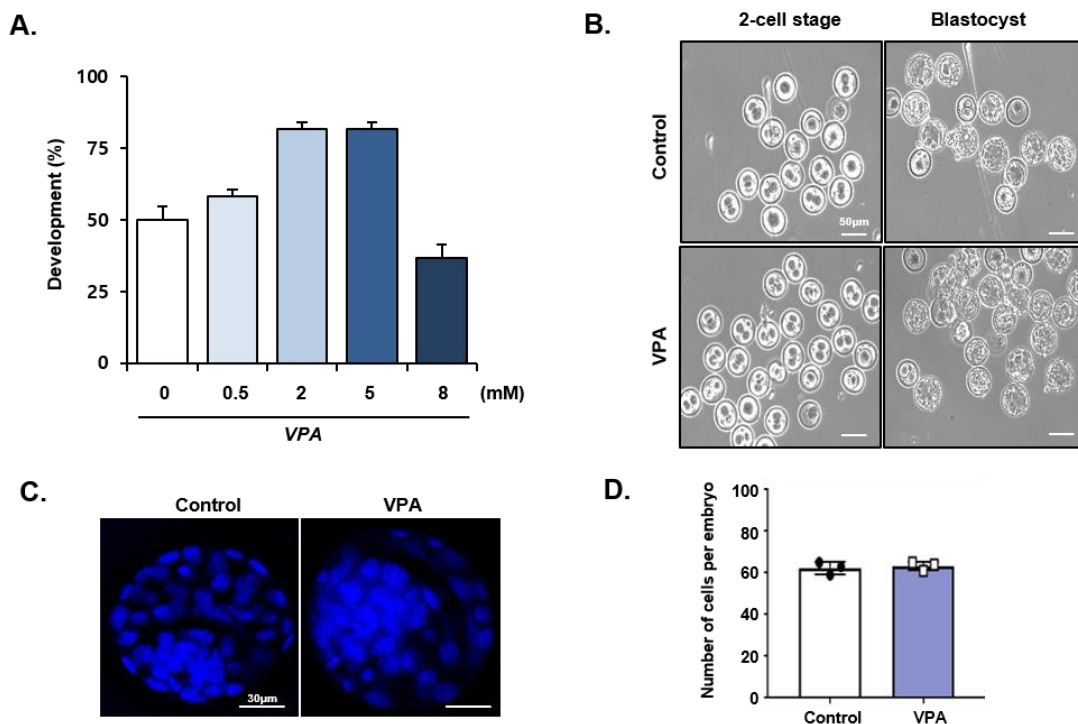

**Figure 2.** Effect of VPA on embryonic development. **(A)** Percentage of blastocysts (early embryonic development) formation of mouse embryo treated with various concentrations of VPA **(B)** Morphology of the embryos untreated or treated with VPA. Morphologies are at different embryonic stages are shown. **(C)** Mouse blastocysts were stained with DAPI to visualize DNA (blue). **(D)** Average cell numbers of blastocysts treated or untreated with VPA. The images in B and C are representatives of  $\geq 3$  similar experiments.

**Figure S3**

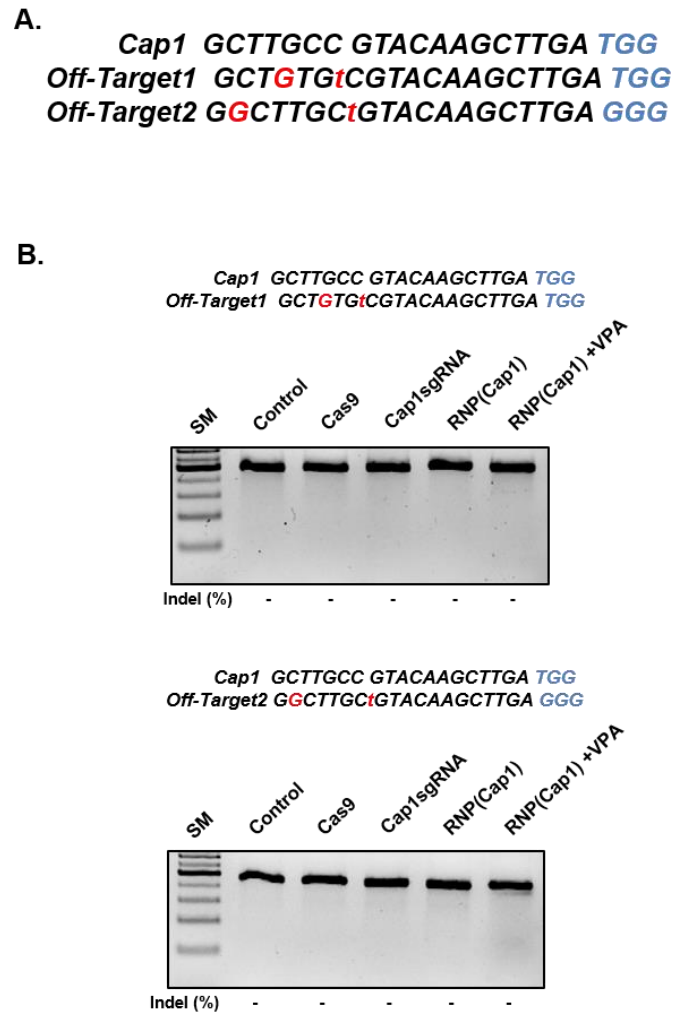

**Figure 3.** Surveyor assay for potential Cap1 off-target sites. (A) Top2 predicted off-target sites for Cap1 sgRNA sequence by Cas-OFFinder software. (B) Surveyor assay for the InDel mutations induced by Cap1 sgRNA in top2 Cap1 off-target sites.

**Figure S4**

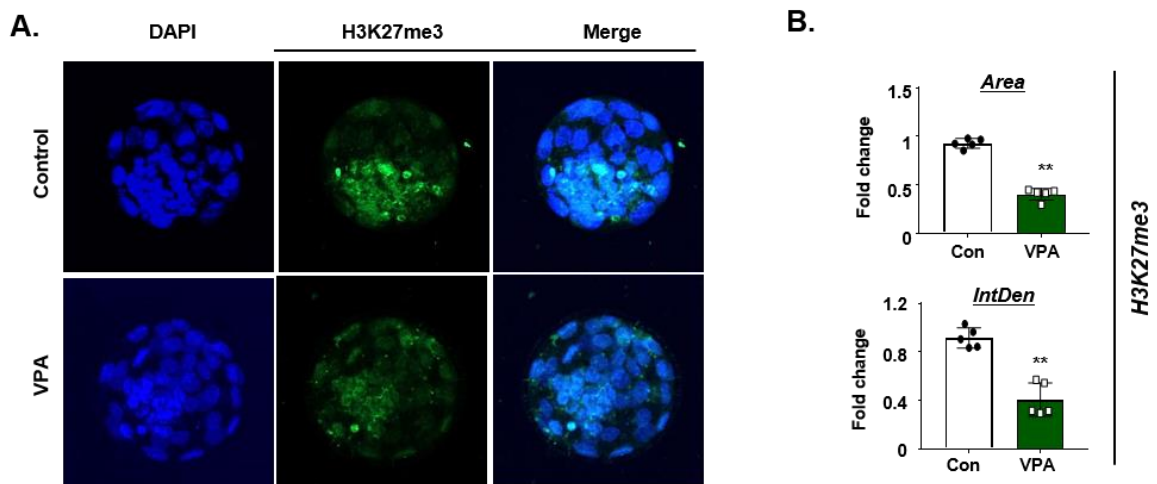

**Figure 4.** Distribution of tri-methylated H3K27 in VPA-treated or untreated mouse embryo. (A) Immunofluorescence of H3K27me3 in mouse blastocysts with or without VPA-treatment. (B)

Quantification of the H3K27me3-positive area and intensity in the mouse blastocysts. Data are expressed as mean  $\pm$  SD,  $n = 5$ .  $**p < 0.01$ , two-sided Student's  $t$ -test. The images in a is representatives of  $\geq 3$  similar experiments.

**Figure S5**

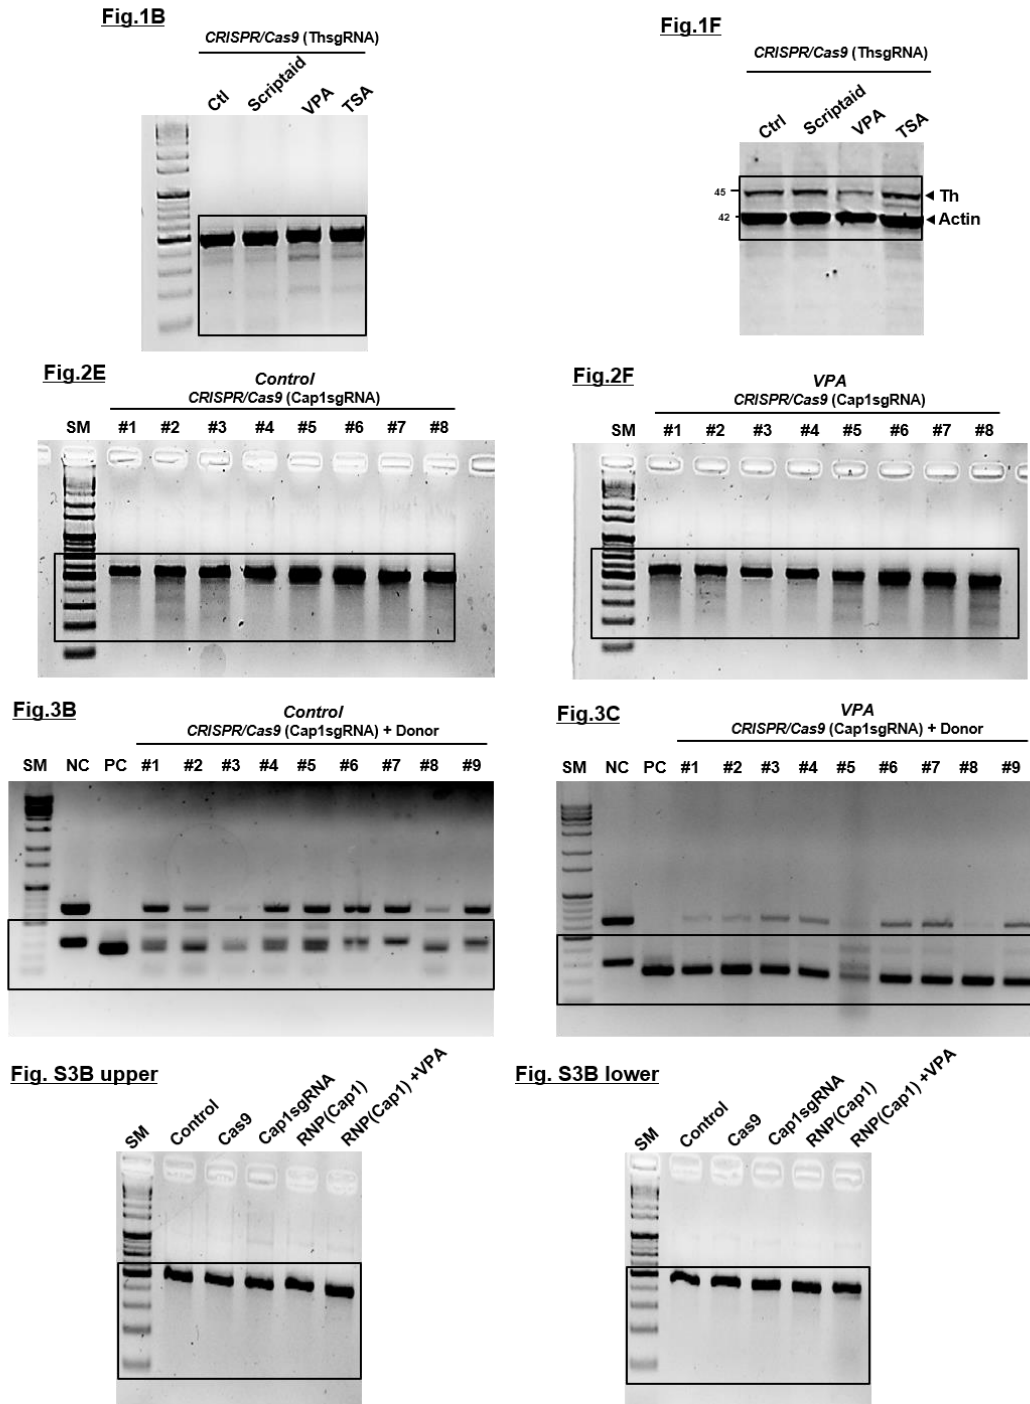

**Figure 5.** Full scans of the western blot and DNA gel presented in this study. Rectangles delimit cropped area used in the figure.

**Table 1.** Effects of VPA on the development of CRISPR/Cas9 injected embryo under different concentration.

| Concentration | No. of injected oocytes | No. of Embryos Developed to (%) |            |
|---------------|-------------------------|---------------------------------|------------|
|               |                         | Cleavage                        | Blastocyst |
| 0 mM          | 60                      | 55 (91.6)                       | 30 (50)    |

|        |    |           |           |
|--------|----|-----------|-----------|
| 0.5 mM | 60 | 56 (93.3) | 35 (58.3) |
| 2 mM   | 60 | 54 (90)   | 49 (81.6) |
| 5 mM   | 60 | 53 (88.3) | 49 (81.6) |
| 8 mM   | 60 | 56 (93.3) | 22 (36.6) |

---
